# Supplementary material for: Mapping similarities in mTOR pathway perturbations in mouse lupus nephritis models and human lupus nephritis
Source: PubMed Central journal article supplement (PMC2656226; doi:10.1186/ar2541), 2008-11-03

# SLE-5:

## Mean Serum Anti-nDNA Antibody Isotypes 10/04/99 (36 Weeks)

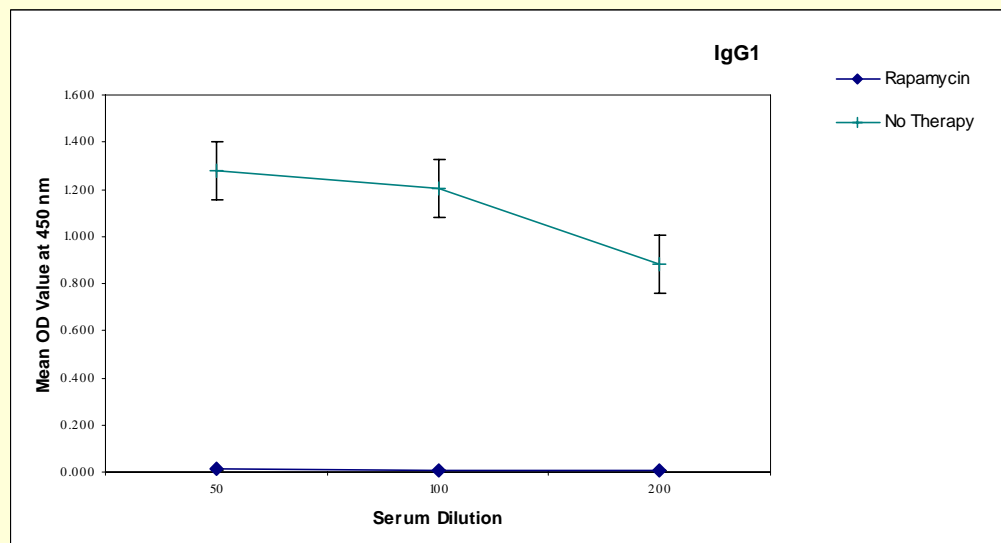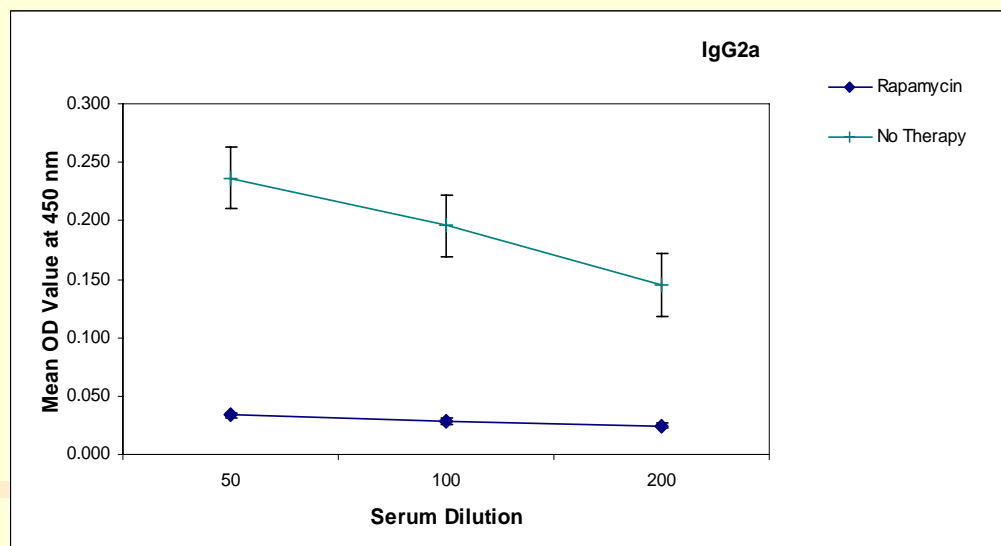

# SLE-5:

## Mean Serum Anti-nDNA Antibody Isotypes 11/05/99 (40 Weeks)

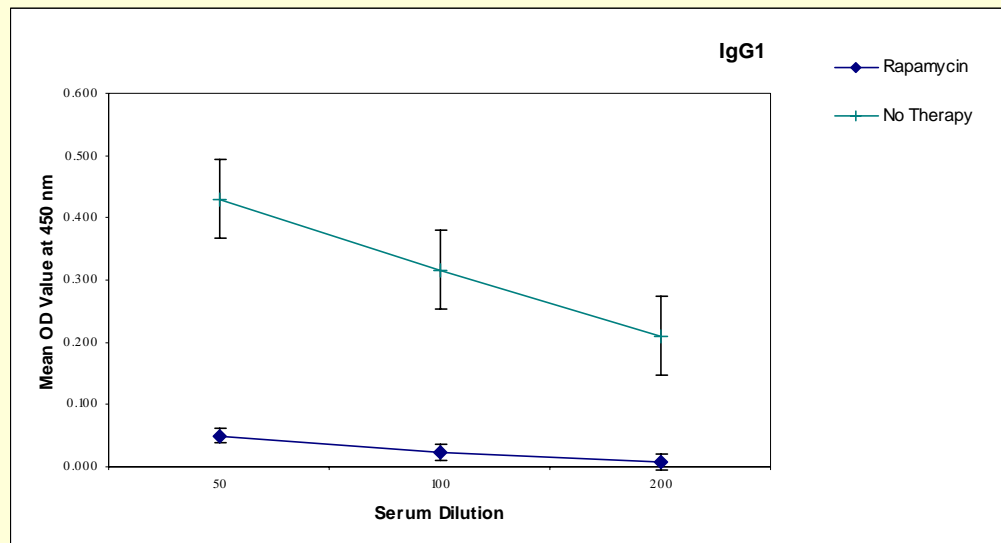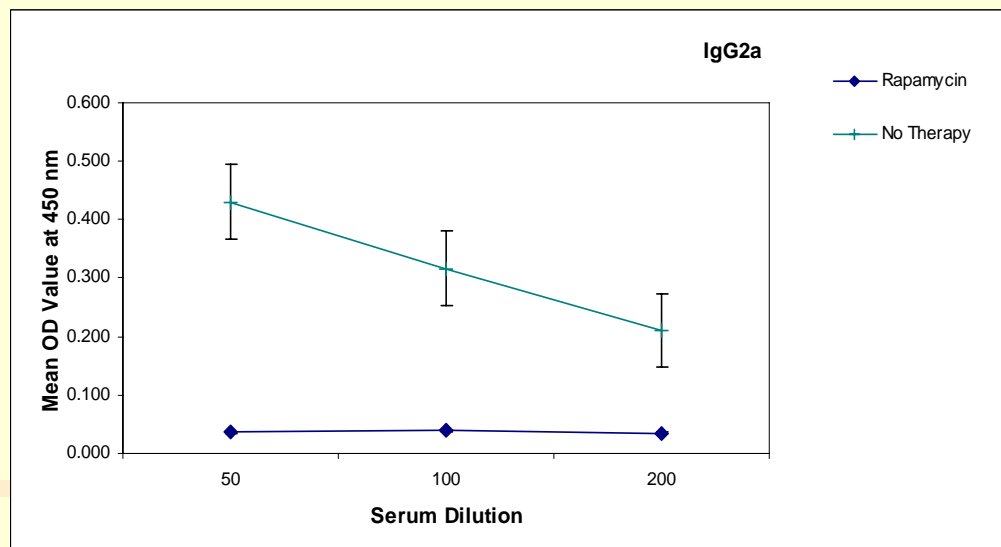

# SLE-5:

## Mean Serum Anti-nDNA Antibody Isotypes 12/30/99 (48 Weeks)

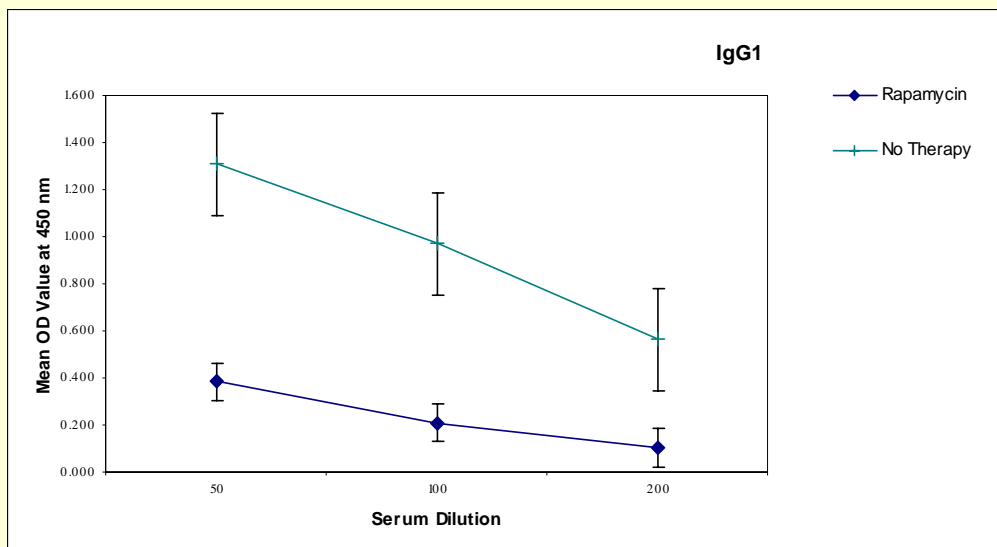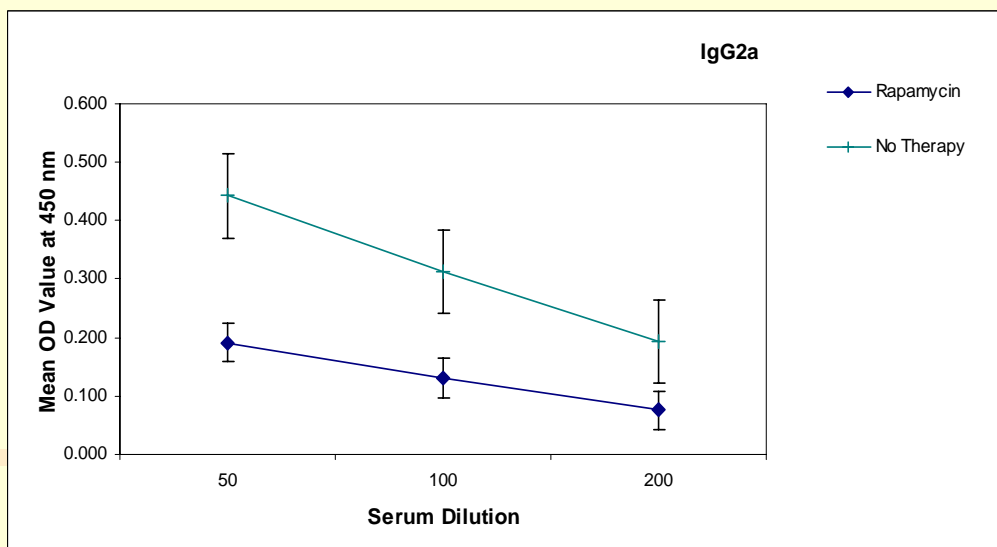

Supplement: ar2541-S1.pdf [file ar2541-S1.pdf]
